# Supplementary material
Source: MDPI journal article supplement (https://www.mdpi.com/2311-7524/9/12/1302)
Supplement: s1 [file s1 › horticulturae-2683566-supplementary.pdf]

## Supplementary Materials

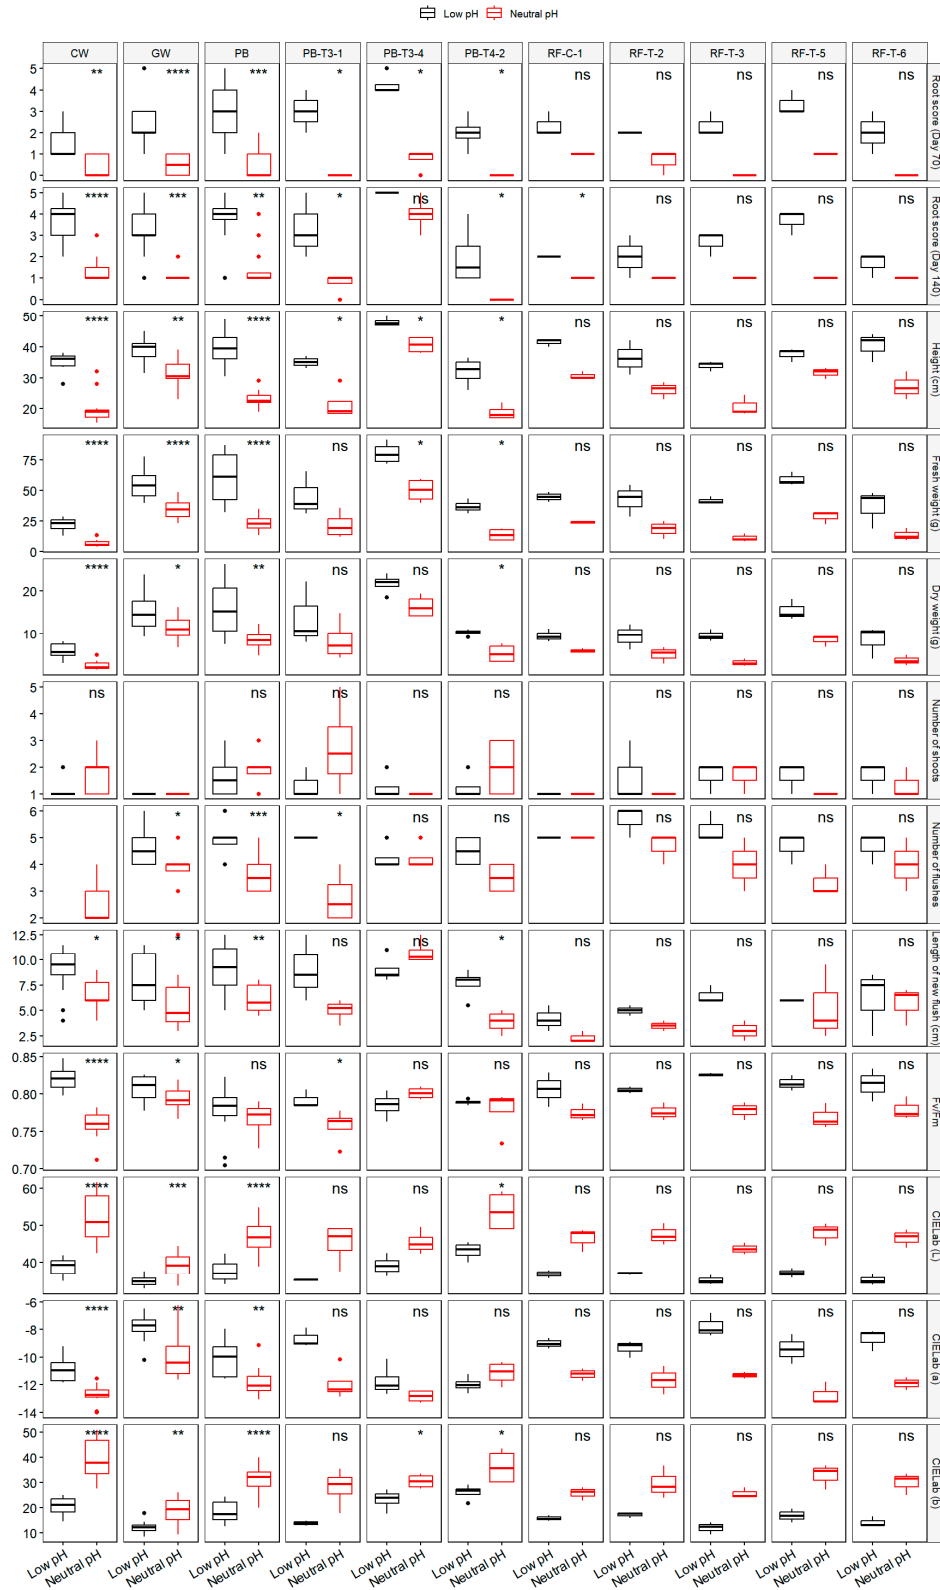

**Figure S1.** Effects of neutral (CaCO<sub>3</sub>) treatment on root score (Day 70 and 140), height, fresh weight, dry weight, number of shoots, number of flushes, length of new flush, F<sub>v</sub>/F<sub>m</sub> and CIELab (L\*, a\*, b\*) of different genotypes. Pairwise comparisons against the control treatment were calculated by Wilcoxon test, and indicated by \*\*\*\* ( $p < 0.0001$ ), \*\*\* ( $p < 0.001$ ), \*\* ( $p < 0.01$ ), \* ( $p < 0.05$ ) and "ns" (not significant) respectively.

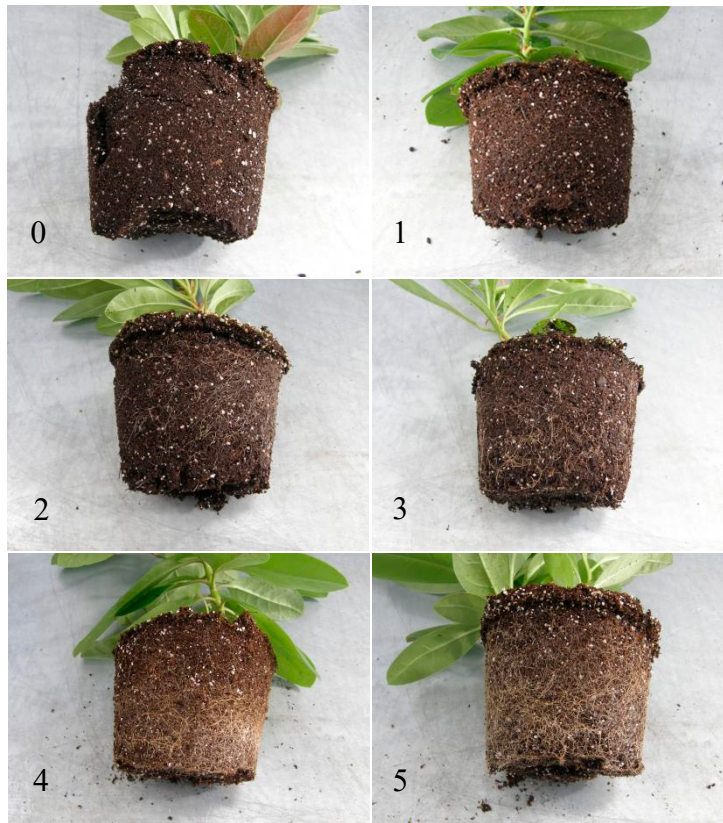

**Figure S2.** Root scores 0 to 5, with score 0: no roots are visible; score 1: a little bit of roots visible at one side or just a single root on a few sides of the root ball; score 2: roots at two sides appear; score 3: roots are visible around the pot; score 4: roots are present around the root ball; score 5: roots from top to bottom are all around the potting soil.

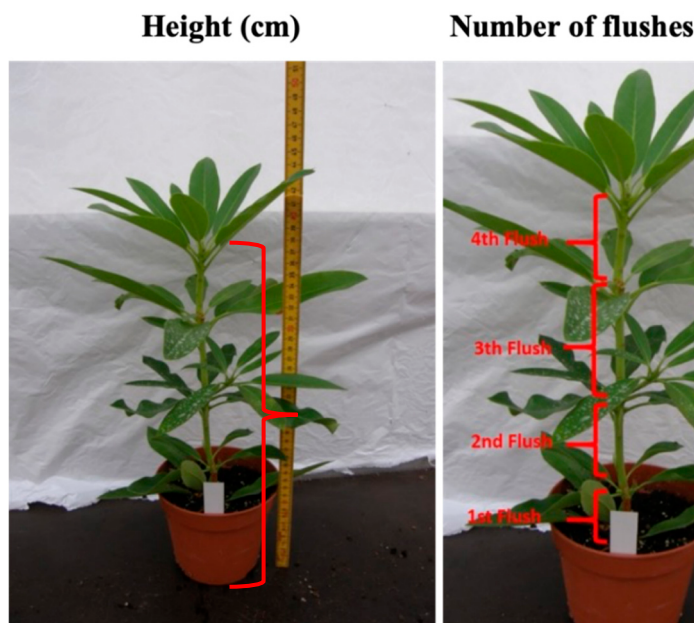

**Figure S3.** Measurements of above ground growth (height) and number of flushes.

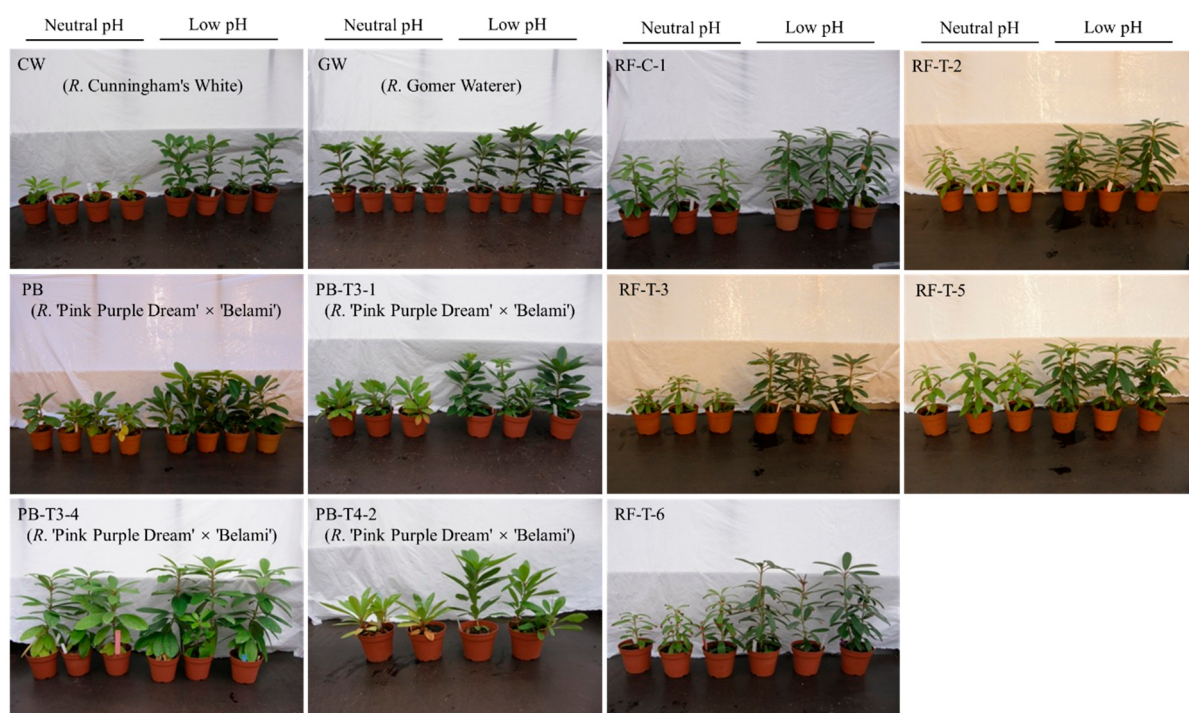

**Figure S4.** Pictures taken at the end of the experiment 140 days after potting in acidic or neutral pH.
